# Supplementary material
Source: PubMed Central journal article supplement (PMC2696158)
Supplement: NIHMS106556-supplement-supplement_1.pdf [file NIHMS106556-supplement-supplement_1.pdf]

**Supplementary material:**

## Video 1

This video shows the movement of leukocytes traveling through the parafoveal capillaries of subject E. The flashing white square on the upper right corner of the frame indicates the subject's pulse.

ACCEPTED MANUSCRIPT
